# Supplementary material
Source: MDPI journal article supplement (https://www.mdpi.com/2076-3417/13/7/4493)
Supplement: s1 [file s1]

# A Screening Model of Antibacterial Agents Based on *Escherichia coli* Cell-Division Protein

Qiuyu Fan <sup>1,2,3,†</sup>, Jianwen Wu <sup>1,†</sup>, Bolin Xi <sup>4</sup>, Chunxiao Li <sup>2</sup>, Xiumin Wang <sup>2,3,\*</sup> and Huanrong Li <sup>1,\*</sup>

<sup>1</sup> College of Animal Science and Technology, Beijing University of Agriculture, Beijing 102206, China; fan-qiuyu0821@163.com (Q.F.); sky33446@163.com (J.W.)

<sup>2</sup> Institute of Feed Research, Chinese Academy of Agricultural Sciences, Beijing 100081, China; 82101212039@caas.cn

<sup>3</sup> Key Laboratory of Feed Biotechnology, Ministry of Agriculture and Rural Affairs, Beijing 100081, China

<sup>4</sup> School of Life Sciences, Jilin University, Changchun, Jilin 130012, China; xibl21@mails.jlu.edu.cn

\* Correspondence: wangxiumin@caas.cn (X.W.); lihuanrong1@126.com (H.L.); Tel.: 0086-10-82106070 (X.W.); 0086-10-80795591 (H.L.)

† These authors contributed equally to this work.

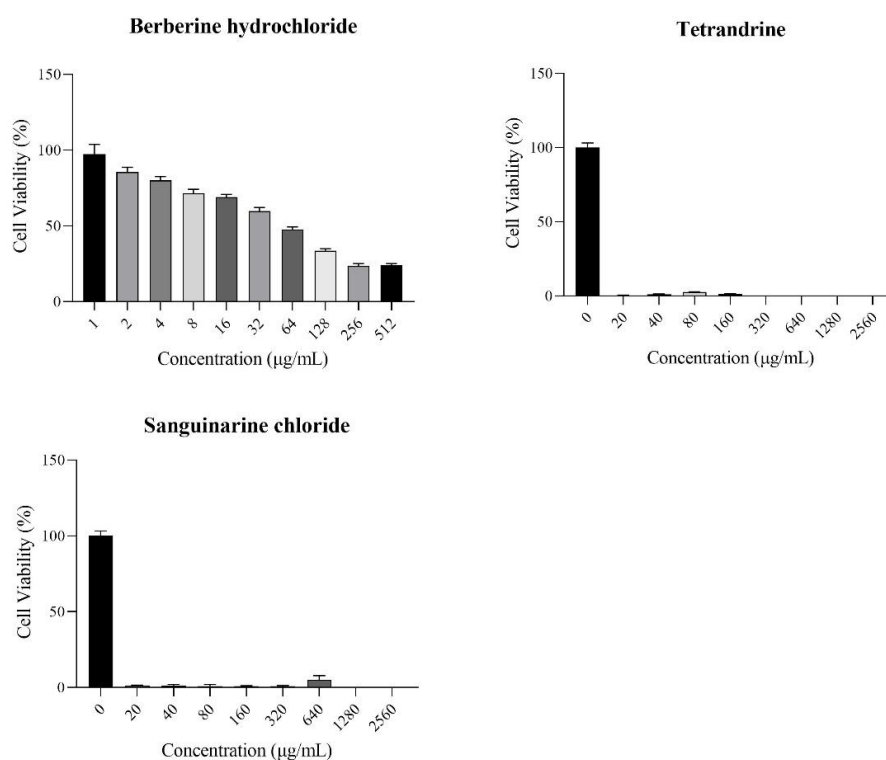

**Figure S1.** Cytotoxicity of three alkaloids to mouse macrophages (RAW264.7).

**Citation:** Fan, Q.; Wu, J.; Xi, B.; Li, C.; Wang, X.; Li, H. A Screening Model of Antibacterial Agents Based on *Escherichia coli* Cell-Division Protein. *Appl. Sci.* **2023**, *13*, 4493. <https://doi.org/10.3390/app13074493>

Academic Editor: Antonio Valero

Received: 22 February 2023

Revised: 24 March 2023

Accepted: 28 March 2023

Published: date

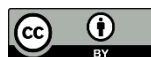

**Copyright:** © 2023 by the authors. Submitted for possible open access publication under the terms and conditions of the Creative Commons Attribution (CC BY) license (<https://creativecommons.org/licenses/by/4.0/>).
